# Supplementary material
Source: PubMed Central journal article supplement (PMC8017396)
Supplement: ryai180069suppa1.pdf [file ryai180069suppa1.pdf]

**Table E1: Hyperparameters and details of each of the deep neural networks used.**

| Attributes    | LAX Localization                                                  | MV Slice Localization                                                                                                               | Bounding Box                                                     | SAX Localization                                                                                                                                                                               |
|---------------|-------------------------------------------------------------------|-------------------------------------------------------------------------------------------------------------------------------------|------------------------------------------------------------------|------------------------------------------------------------------------------------------------------------------------------------------------------------------------------------------------|
| Module Input  | VLAX                                                              | SAX stack                                                                                                                           |                                                                  |                                                                                                                                                                                                |
| Module Output | MV, Apex Localization                                             | AV, MV, PV, TV Localization                                                                                                         |                                                                  |                                                                                                                                                                                                |
| Preprocessing | Down sampling to 128 × 128                                        | Rolling windows using focal slice and 2 basal and 2 apical slices, rotated into standard orientation, field of view cropped to 280° | Rotated into standard orientation, field of view cropped to 280° | Rotated into standard orientation, cropped bounding box to 128 × 128 using predicted segmentation, use slices from predicted minimum window. Intensity values were normalized between 0 and 1. |
| Training Data | 4 Ch, 3Ch, 2 Ch, HLAX, VLAX Planes                                | 5 slice windows from SAX Stacks                                                                                                     | SAX Stacks                                                       | Bounding Box Cropped SAX Windows                                                                                                                                                               |
| Model Type    | Heatmap Regression                                                | Classification                                                                                                                      | Segmentation                                                     | Heatmap Regression                                                                                                                                                                             |
| Base Model    | 2D U-net                                                          | Multichannel VGG-19                                                                                                                 | 2.5D U-net                                                       | 2.5D U-net                                                                                                                                                                                     |
| Purpose       | To localize MV and Apex                                           | To identify the first window where the focal slice is ventricular                                                                   | To create a heart bounding box                                   | To in-plane localize AV, MV, PV, TV                                                                                                                                                            |
| Sigma         | 60                                                                | —                                                                                                                                   | —                                                                | 60 for 65 epochs, then 40 for 65 epochs                                                                                                                                                        |
| Epochs        | 70                                                                | 35                                                                                                                                  | 40                                                               | 130                                                                                                                                                                                            |
| Kernel size   | 32 for top two conv layers, then 9 for each additional conv layer | 3                                                                                                                                   | 3                                                                | 36 for top two conv layers, then 9 for each additional conv layer                                                                                                                              |
| Learning Rate | 10e-4                                                             | 10e-4                                                                                                                               | 10e-4                                                            | 10e-3                                                                                                                                                                                          |
